1 **GPR183 regulates interferons and bacterial growth during**

2 ***Mycobacterium tuberculosis* infection: interaction with type 2 diabetes**

3 **and TB disease severity**

4  
5 Stacey Bartlett<sup>1¶</sup>, Adrian Tandhyka Gemiarto<sup>1¶</sup>, Minh Dao Ngo<sup>1</sup>, Hareshh Saijir<sup>1&</sup>, Semira  
6 Hailu<sup>1&</sup>, Roma Sinha<sup>1&</sup>, Cheng Xiang Foo<sup>1</sup>, Léanie Kleynhans<sup>2</sup>, Happy Tshivhula<sup>2</sup>, Tariq  
7 Webber<sup>2</sup>, Helle Bielefeldt-Ohmann<sup>3,4</sup>, Nicholas P. West<sup>3,4</sup>, Andriette M. Hiemstra<sup>2</sup>, Candice  
8 E. MacDonald<sup>2</sup>, Liv von Voss Christensen<sup>5</sup>, Larry S. Schlesinger<sup>6</sup>, Gerhard Walzl<sup>2</sup>, Mette  
9 Marie Rosenkilde<sup>5</sup>, Thomas Mandrup-Poulsen<sup>5</sup> and Katharina Ronacher<sup>1,2,4</sup>

10 <sup>1</sup> Translational Research Institute - Mater Research Institute - The University of Queensland, Brisbane, QLD,  
11 Australia.

12 <sup>2</sup>DSI-NRF Centre of Excellence for Biomedical Tuberculosis Research; South African Medical Research  
13 Council Centre for Tuberculosis Research; Division of Molecular Biology and Human Genetics, Faculty of  
14 Medicine and Health Sciences, Stellenbosch University, Cape Town, South Africa.

15 <sup>3</sup>School of Chemistry and Molecular Biosciences, The University of Queensland, St Lucia, Australia

16 <sup>4</sup>Australian Infectious Diseases Research Centre – The University of Queensland, Brisbane, QLD, Australia

17 <sup>5</sup>Department of Biomedical Sciences, University of Copenhagen, Denmark

18 <sup>6</sup>Texas Biomedical Research Institute, San Antonio, TX, 78227 USA.

19  
20 <sup>¶</sup>Authors contributed equally

21 <sup>&</sup>Authors contributed equally

22 **Conflict of interest:** MMR is a co-founder of Antag Therapeutics and of Synklino. All other authors have  
23 declared that no conflict of interest exists.

24 **Corresponding author information**

25 Katharina Ronacher, PhD, Translational Research Institute, Mater Research Institute – The  
26 University of Queensland, Brisbane, Australia

27 email: [katharina.ronacher@mater.uq.edu.au](mailto:katharina.ronacher@mater.uq.edu.au)

28 **Abstract**

29 Oxidized cholesterol have emerged as important signaling molecules of immune function,  
30 but little is known about the role of these oxysterols during mycobacterial infections. We  
31 found that expression of the oxysterol-receptor GPR183 was reduced in blood from patients  
32 with tuberculosis (TB) and type 2 diabetes (T2D) compared to TB patients without T2D and  
33 was associated with TB disease severity on chest x-ray. GPR183 activation by  $7\alpha,25$ -  
34 hydroxycholesterol ( $7\alpha,25$ -OHC) reduced growth of *Mycobacterium tuberculosis* (Mtb) and  
35 *Mycobacterium bovis* BCG in primary human monocytes, an effect abrogated by the  
36 GPR183 antagonist GSK682753. Growth inhibition was associated with reduced IFN- $\beta$  and  
37 IL-10 expression and enhanced autophagy. Mice lacking GPR183 had significantly  
38 increased lung Mtb burden and dysregulated IFNs during early infection. Together, our data  
39 demonstrate that GPR183 is an important regulator of intracellular mycobacterial growth  
40 and interferons during mycobacterial infection.

41

42 **Keywords**

43 Tuberculosis, *Mycobacterium tuberculosis*, diabetes, oxysterols,  $7\alpha,25$ -hydroxycholesterol,  
44 GPR183, EBI2, host-directed therapy

45

46

47

48

49

50

51

52

53 **Graphical Abstract**

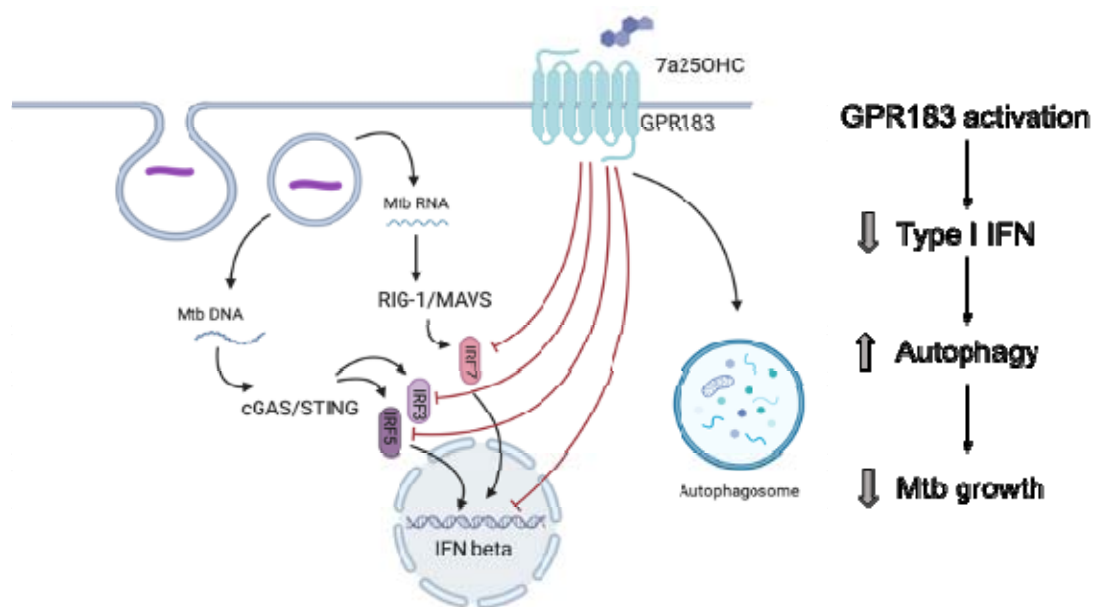

54

55

## 56 **Background**

57 Patients with tuberculosis and type 2 diabetes (TB-T2D) co-morbidity have increased  
58 bacterial burden and more severe disease, characterized by higher sputum smear grading  
59 scores and greater lung involvement on chest x-ray compared to TB patients without T2D  
60 [1]. TB-T2D patients are also more likely to fail TB therapy and to relapse [1]. The reason  
61 for the increased disease severity has largely been attributed to hyperglycemia-mediated  
62 immune dysfunction, but hyperglycemia alone does not fully explain these observations [1,  
63 2]. We recently showed that independent of hyperglycemia, cholesterol concentrations in  
64 T2D patients vary greatly across different ethnicities [3]. However, how cholesterol and its  
65 metabolites contribute to *Mycobacterium tuberculosis* (Mtb) infection outcomes remains to  
66 be elucidated.

67 To gain novel insights into the underlying immunological mechanisms of increased  
68 susceptibility of T2D patients to TB and to identify novel targets for host-directed therapy  
69 (HDT), we performed whole blood transcriptomic screens on TB patients with and without  
70 T2D and identified differential regulation of the transcript for oxidized cholesterol-sensing G  
71 protein-coupled receptor (GPCR), GPR183. Also known as Epstein Barr virus-induced gene  
72 2 (EBI2), GPR183 is primarily expressed on cells of the innate and adaptive immune  
73 system [4-6]. Several oxysterols can bind to GPR183 with  $7\alpha,25$ -hydroxycholesterol  
74 ( $7\alpha,25$ -OHC) being the most potent endogenous agonist [4, 7, 8]. GPR183 has been  
75 studied mainly in the context of viral infections [9], immune cells [4, 5, 7, 10-16], and  
76 astrocytes [17, 18]; and facilitates the chemotactic distribution of lymphocytes, dendritic  
77 cells and macrophages to secondary lymphoid organs [10, 13, 14, 19, 20]. Little is known  
78 about the biological role of GPR183 in the context of bacterial infections, including TB. We  
79 show here that GPR183 is a key regulator of intracellular bacterial growth and type-I IFN

80 production during mycobacterial infection and reduced GPR183 expression is associated  
81 with increased TB disease severity.

## 82 **Methods**

### 83 *Study participants*

84 TB patients and their close contacts were recruited at TB clinics outside Cape Town (South  
85 Africa). TB diagnosis was made based on positive GeneXpert MTB/RIF (Cepheid;  
86 California, USA) and/or positive MGIT culture (BD BACTED MGIT 960 system, BD, New  
87 Jersey, USA) and abnormal chest x-ray. Chest x-rays were scored, based on Ralphps score  
88 [21], by two clinicians independently. Participants with LTBI were close contacts of TB  
89 patients, who tested positive on QuantiFERON-TB Gold in tube assay (Qiagen, Hilden,  
90 Germany). All study participants were screened for T2D based on HbA1c  $\geq$  6.5% and  
91 random plasma glucose  $\geq$  200 mg/dL or a previous history of T2D. Further details are  
92 available in the supplementary materials.

93

### 94 *RNA extractions and Nanostring Analysis*

95 Total RNA was extracted from cell pellets collected in QuantiFERON-TB gold assay tubes  
96 without antigen using the Ribopure Ambion RNA isolation kit (Life Technologies, California,  
97 USA), and eluted RNA treated with DNase for 30 min. Samples with a concentration of  $\geq$  20  
98 ng/ $\mu$ L and a 260/280 and 260/230 ratio of  $\geq$  1.7 were analyzed at NanoString Technologies  
99 in Seattle, Washington, USA. Differential expression of 594 genes, including 15  
100 housekeeping genes, was performed using the nCounter GX Human Immunology kit V2.  
101 NanoString RCC data files were imported into the nSolver 3 software (nSolver Analysis  
102 software, v3.0) and gene expression was normalized to housekeeping genes.

103

### 104 *Cell culture*

105 Peripheral blood mononuclear cells (PBMCs) were obtained from healthy donor blood by  
106 Ficoll-Paque (GE Healthcare, Illinois, USA) gradient centrifugation and monocytes (MNs)  
107 isolated using the Pan Monocyte Isolation kit (Miltenyi Biotec, Bergisch Gladbach,  
108 Germany), with >95% purity assessed by flow cytometry. MNs were plated onto Poly-D-  
109 lysine coated tissue culture plates ( $1.3 \times 10^5$  cells/well) and rested overnight at  
110  $37^\circ\text{C}/5\%\text{CO}_2$  in RPMI-1640 medium supplemented with 10% heat-inactivated human AB  
111 serum (Sigma Aldrich, Missouri, USA), 2 mM L-glutamine and 1 mM sodium pyruvate  
112 before infection. THP-1 cells (ATCC #TIB-202) were differentiated with 25 ng/mL PMA for  
113 48h and rested for 24h prior to infection.

114

#### 115 *In vitro Mtb (H<sub>37</sub>R<sub>v</sub>)/M. bovis (BCG) infection*

116 *Mtb H<sub>37</sub>R<sub>v</sub>* or *M. bovis* BCG single cell suspensions were added at a multiplicity of infection  
117 (MOI) of 1 or 10 with/without 100 nM  $7\alpha,25$ -dihydroxycholesterol (Sigma Aldrich) and  
118 with/without 10  $\mu\text{M}$  GSK682753 (Focus Bioscience, Queensland, Australia), followed by 2h  
119 incubation at  $37^\circ\text{C}/5\%\text{CO}_2$  to allow for phagocytosis. Non-phagocytosed bacilli were  
120 removed by washing each well twice in warm RPMI-1640 containing 25 mM HEPES  
121 (Thermo Fisher Scientific). Infected cells were incubated ( $37^\circ\text{C}/5\%\text{CO}_2$ ) in medium  
122 with/without GPR183 agonist and/or antagonist and CFUs determined after 48h.

123 To quantify bacterial growth over time, CFUs at 48h were normalized to uptake at 2h.  
124 Percentages of mycobacterial growth were determined relative to untreated cells. For RNA  
125 extraction, MNs were lysed by adding 500  $\mu\text{L}$  of TRIzol reagent. Further details are  
126 provided in the supplementary information.

127

#### 128 *Western Blotting*

129 THP-1 cells were infected with BCG with/without 100nM 7 $\alpha$ ,25-OHC and with/without 10  
130  $\mu$ M GSK682753 and lysed at 6 or 24h post infection (p.i.) in ice-cold RIPA buffer (150 mM  
131 sodium chloride, 1.0% Triton X-100, 0.5% sodium deoxycholate, 0.1% SDS, 50 mM Tris,  
132 pH 8.0; Thermo Fisher Scientific), supplemented with complete Protease Inhibitor Cocktail  
133 (Sigma Aldrich) (120  $\mu$ L RIPA/1 x 10<sup>6</sup> Cells). Protein concentrations were determined using  
134 Pierce BCA Protein Assay Kit (Thermo Fisher Scientific) as per manufacturer's protocol.  
135 Ten  $\mu$ g of protein per sample was loaded on Novex<sup>TM</sup> 10-20% Tris-Glycine protein gels  
136 (Thermo Fisher Scientific) and transferred onto iBlot2 Transfer Stacks PVDF membrane  
137 (Thermo Fisher Scientific). Membranes were blocked with Odyssey Blocking buffer  
138 (Millennium Science, Victoria, Australia) for 2h, probed with rabbit anti-human LC3B  
139 (1:1000, Sigma L7543) and rabbit anti-human GAPDH (1:2500, Abcam 9485) overnight,  
140 followed by detection with goat anti-rabbit IgG DyLight 800 (1:20,000; Thermo Fisher  
141 Scientific). Bands were visualized using the Odyssey CLx system (LI-COR Biosciences,  
142 Nebraska, USA) and analyzed with Image Studio Lite V5.2 (LI-COR Biosciences).

143

#### 144 *Immunofluorescence*

145 Differentiated THP-1 cells were seeded onto a PDL coated, 96-well glass-bottom black  
146 tissue culture plate (4.5 x 10<sup>4</sup> cells/well) and kept in RPMI-1640 medium minus phenol red  
147 (Thermo Fisher Scientific) supplemented with 10% heat-inactivated FBS at 37°C/5% CO<sub>2</sub>.  
148 Cells were infected with BCG, at a MOI of 10, with/without 100 nM 7 $\alpha$ ,25-OHC, with/without  
149 10  $\mu$ M GSK682753 for 2h, washed and incubated for a further 4h with agonists and  
150 antagonists. Cells were then fixed with 4% paraformaldehyde in PBS for 15 min,  
151 permeabilized with 0.05% saponin (Sigma Aldrich) for 20 min and blocked with 1% BSA,  
152 0.05% saponin (Sigma Aldrich) for 1h. Cells were immunolabeled with rabbit anti-human  
153 LC3B (ThermoFisher L10382; 1:1000), 0.05% saponin at room temperature for 1h followed

154 by Alexa Fluor™ 647 goat anti-rabbit IgG (ThermoFisher A21245; 1:1000), 0.05% saponin  
155 at room temperature for 1h followed by nuclear staining with Hoechst 33342 (Thermo  
156 Fisher Scientific 62249; 1:2000) for 15 min. Cells were washed and confocal microscopy  
157 was performed using the Olympus FV3000, 60X magnification. Images obtained were  
158 analyzed with the ImageJ software [22].

159

#### 160 *Murine GPR183 KO vs WT model*

161 Equal numbers of male and female C57BL/6 WT and Gpr183<sup>tm1Lex</sup> (age 18-20 weeks, 10  
162 mice per group/timepoint) were aerosol infected with 300 CFU Mtb H<sub>37</sub>R<sub>v</sub> using an  
163 inhalation exposure system (Glascol). At 2- and 5-weeks post infection, lungs and blood  
164 were collected for RNA and CFU determination. Formalin-fixed lung lobes were sectioned  
165 and examined microscopically and scored by a veterinary pathologist. Further details are  
166 available in the supplementary information.

167

#### 168 *Statistical analysis*

169 Statistical analysis was performed using GraphPad Prism v.7.0.3 (GraphPad Software). *T*-  
170 test and Wilcoxon's test were used to analyze Nanostring data. Mann-Whitney *U* test and *t*-  
171 test were used to analyze in vitro infection, qPCR, and ELISA data. Data are presented as  
172 means ± SEM. Statistically significant differences between two groups are indicated in the  
173 figures as follows ns, *P* > 0.05; \*, *P* < 0.05; \*\*, *P* < 0.01; \*\*\*, *P* < 0.001; \*\*\*\*, *P* < 0.0001.

174

#### 175 *Ethics statement*

176 The human studies were approved by the Institutional Review Board of Stellenbosch  
177 University (N13/05/064 and N13/05/064A) and all study participants signed pre-approved  
178 informed consent documents prior to enrolment into the studies. All animal studies were



179 approved by the Animal Ethics Committee of the University of Queensland (MRI-  
180 UQ/596/18) and conducted in accordance with the *Australian Code for the Care and Use of*  
181 *Animals for Scientific Purposes*.

182

## 183 **Results**

### 184 **Blood GPR183 mRNA expression is reduced in patients with TB-T2D compared to TB** 185 **patients without T2D**

186 Blood was obtained from study participants with latent TB infection (LTBI, n=11), latent TB  
187 infection with T2D (LTBI+T2D, n=14), active pulmonary TB disease (TB, n=9), and active  
188 pulmonary TB disease with T2D (TB+T2D, n=7). Total RNA was extracted and NanoString  
189 analyzes performed. Among genes differentially expressed between TB and TB+T2D we  
190 identified a single GPCR, GPR183. We focused on GPR183 as GPCRs are *bona fide* drug  
191 targets due to their importance in human pathophysiology and their pharmacological  
192 tractability.

193

194 GPR183 expression was significantly down-regulated at diagnosis ( $p = 0.03$ , *t*-test) in blood  
195 from TB+T2D patients compared to TB patients without T2D (Figure 1A). The reduced  
196 GPR183 expression was not driven by diabetes *per se*, as there were no differences in  
197 GPR183 expression between LTBI and LTBI+T2D (Figure 1B). After 6 months, at the end  
198 of successful TB treatment, we saw GPR183 expression significantly increased ( $p=0.0156$ )  
199 in TB+T2D patients to a level comparable to the TB patients without T2D (Figure 1C).  
200 Therefore, we speculated that blood GPR183 expression is associated with extent of TB  
201 disease, which is frequently more severe in T2D patients. We indeed determined an inverse  
202 correlation between GPR183 mRNA expression in blood and TB disease severity on chest  
203 x-ray (Figure 1D).

204

205 In order to identify which cell type is associated with decreased expression of GPR183 in  
206 blood, we performed flow cytometry analysis for GPR183 expression on PBMCs from TB  
207 patients with and without T2D. We found that the only cell type with a significant reduction  
208 in GPR183 positivity in TB+T2D vs. TB, both in terms of frequency and median fluorescent  
209 intensity, was the non-classical monocyte population (Supplementary figure 1). We  
210 therefore next investigated whether GPR183 plays a role in the innate immune response  
211 during Mtb infection.

212

### 213 **Oxysterol-induced activation of GPR183 reduces intracellular mycobacterial growth**

214 We investigated whether in vitro activation of GPR183 with its endogenous agonist impacts  
215 the immune response to mycobacteria in primary human MNs. MNs from 15 healthy donors  
216 were infected with BCG (n=7) or Mtb H<sub>37</sub>R<sub>V</sub> (n=8) (Figure 2) at a MOI of 1 in the presence  
217 or absence of the GPR183 agonist 7 $\alpha$ ,25-OHC and/or the antagonist GSK682753.  
218 Activation of GPR183 by 7 $\alpha$ ,25-OHC significantly increased the uptake of BCG and Mtb  
219 H<sub>37</sub>R<sub>V</sub> (Figure 2A) at 2h p.i. This increase in phagocytosis was abolished by the  
220 simultaneous addition of the GPR183 antagonist GSK682753, confirming that increased  
221 mycobacterial uptake was the result of GPR183 activation. Interestingly, we observed  
222 ~50% reduction in the growth of BCG and Mtb H<sub>37</sub>R<sub>V</sub> (Figure 2B) by 48h p.i. in 7 $\alpha$ ,25-OHC  
223 treated cells, and again, this effect was abrogated by GSK682753. The addition of 7 $\alpha$ ,25-  
224 OHC and/or GSK682753 had no detrimental effect on the viability of human THP-1 cells  
225 (Supplementary figure 2A). There was also no effect of 7 $\alpha$ ,25-OHC and GSK682753 on  
226 BCG growth in liquid culture (Supplementary figure 2B), thus confirming that the significant  
227 mycobacterial growth inhibition in MN cultures was attributable to the immune modulatory

228 activity of  $7\alpha,25\text{-OHC}$  via GPR183. Independently, we observed that  $\text{H}_{37}\text{R}_v$  down-regulates  
229 GPR183 in primary MNs (Supplementary figure 3).

230 To confirm the role of GPR183 in phagocytosis and growth inhibition, we next performed  
231 GPR183 siRNA knockdown experiments. Differentiated THP-1 cells were transfected with  
232 20 nM of *GPR183*-targeting siRNA (siGPR183) or negative control siRNA (siControl). We  
233 observed ~80% reduction of *GPR183* mRNA level and ~50% reduction of protein  
234 expression in cells transfected with siGPR183 when compared to siControl-transfected cells  
235 (Supplementary figure 4A and B) at 48h. Forty-eight h after transfection the cells were  
236 infected with BCG at a MOI of 1. We observed a marked decrease in BCG uptake in cells  
237 transfected with siGPR183 ( $p = 0.0048$ ) compared to siControl-transfected cells and a  
238 significant increase in intracellular mycobacterial growth over time ( $p = 0.0113$ , Figure 2C).

239

#### 240 **GPR183 is a negative regulator of the type I interferon pathway in human MNs**

241 In genome wide association studies GPR183 has been implicated as a negative regulator  
242 of the IRF7 driven inflammatory network [23]. Therefore, we focused subsequent  
243 experiments on type-I IFN regulation. To determine whether GPR183, a constitutively active  
244 GPCR [24], has a direct effect on *IRFs* and *IFNB1* expression we performed knockdown  
245 experiments in primary MNs. GPR183 knockdown (Supplementary figure 4C) up-regulated  
246 *IFNB1* (2.7-5.5 fold;  $P = 0.0115$ ) as well as *IRF1*, *IRF3*, *IRF5* and *IRF7*, although the latter  
247 did not reach statistical significance (Figure 3A).

248 *IRF1*, *IRF5*, and *IRF7* transcripts were similarly up-regulated in whole blood from TB+T2D  
249 patients compared to TB patients (Figure 3B), consistent with the downregulation of  
250 *GPR183* mRNA expression (Figure 1C).

251

#### 252 **GPR183 activation induces a cytokine profile favoring Mtb control**

253 Next, we investigated whether the reduced intracellular mycobacterial growth observed in  
254 primary MNs treated with  $7\alpha,25$ -OHC was associated with a change in MN secreted  
255 cytokines. Gene expression of *IFNB1*, *TNF*, and *IL-10* was measured 24h following  
256 infection with Mtb H<sub>37</sub>R<sub>V</sub> at MOI of 1 (Figure 4A). The concentrations of the corresponding  
257 cytokines were measured in cell culture supernatant by ELISA (Figure 4B). Mtb infection  
258 significantly up-regulated the expression of *IFNB1* ( $P = 0.0068$ ), *TNF* ( $P = 0.0001$ ), *IL-10* ( $P$   
259  $< 0.0001$ ) (Figure 4A) and *IL-1B* (Supplementary figure 5).  $7\alpha,25$ -OHC significantly down-  
260 regulated Mtb-induced *IFNB1* expression ( $P = 0.0017$ ), while it did not affect *TNF*, *IL-10* or  
261 *IL-1B* expression. At the protein level, the concentrations of IFN- $\gamma$  and IL-10, but not TNF- $\alpha$   
262 or IL-1 $\beta$  were significantly lower in the culture supernatant of  $7\alpha,25$ -OHC-treated Mtb-  
263 infected primary MNs compared to untreated infected cells ( $P < 0.0001$  and  $P = 0.0090$ ,  
264 respectively, Figure 4B).

265

### 266 **The oxysterol $7\alpha,25$ -OHC induces autophagy**

267 We aimed to identify whether  $7\alpha,25$ -OHC impacts the production of reactive oxygen  
268 species (ROS) and the autophagy pathway. ROS production in BCG-infected primary MNs  
269 was not affected by  $7\alpha,25$ -OHC (Supplementary figure 6); however, we observed an  
270 increase in accumulation of LC3B-II in BCG-infected THP-1 cells treated with  $7\alpha,25$ -OHC  
271 ( $P = 0.0119$ , Figure 5A). We next performed the experiments in absence and presence of  
272 the lysosomal inhibitor chloroquine in order to determine autophagic flux. Autophagic flux in  
273 BCG-infected cells was significantly increased with  $7\alpha,25$ -OHC treatment ( $P = 0.0069$ ,  
274 Figure 5B). The simultaneous addition of the GPR183 antagonist GSK682753 with  $7\alpha,25$ -  
275 HC, decreased the levels of LC3B-II and autophagic flux, however, this did not reach  
276 statistical significance.

277

278 We next confirmed the induction of autophagy via microscopy. The number of LC3B-II  
279 puncta per cell increased in 7 $\alpha$ ,25-OHC stimulated BCG-infected THP-1 cells compared to  
280 untreated BCG-infected cells ( $P = 0.0358$ , Figure 5C). The 7 $\alpha$ ,25-OHC effect could be  
281 reduced by antagonist GSK682753 ( $P = 0.0196$ ).

282

### 283 **GPR183 KO mice are unable to contain Mtb during the early stage of infection**

284 To confirm the effect of the GPR183 receptor in vivo, we infected WT and GPR183 KO  
285 mice with aerosolized Mtb. At 2 weeks p.i., GPR183 KO mice showed significantly  
286 increased mycobacterial burden in the lungs compared to WT mice ( $P = 0.0084$ , Figure  
287 6A), while the bacterial burden was comparable at 5 weeks p.i. (Supplementary figure 7).  
288 GPR183 KO mice also had higher lung pathology scores, although this did not reach  
289 significance (Figure 6B). GPR183 KO mice had significantly increased *Ifnb1* expression in  
290 the lungs ( $P = 0.0256$ ; Figure 6C), along with increased *Irf3* ( $P = 0.0159$ ), however, *Irf5*  
291 (Supplementary figure 8) and *Irf7* (Figure 6C) remained unchanged. *Irf7* transcription was  
292 increased in blood from GPR183 KO compared to WT mice ( $P = 0.0513$ ; Fig 6D), but *Ifnb1*,  
293 *Irf3* and *Irf5* expression was not different (Figure 6D, Supplementary figure 6). At the RNA  
294 level *Tnf*, *Ifnb* and *Il1b* were similar between GPR183 KO and WT mice (Figure 7A).  
295 Unexpectedly, at the protein level, the concentrations of IFN- $\beta$  ( $P = 0.0232$ ) and IFN- $\gamma$  ( $P =$   
296  $0.0232$ ) were significantly lower in GPR183 KO mice lung, while TNF- $\alpha$  ( $P = 0.7394$ ) and IL-  
297  $1\beta$  ( $P = 0.0753$ ) were similar to WT mice (Figure 7B).

298

### 299 **Discussion**

300 Historically oxidized cholesterols, so called oxysterols, were considered by-products that  
301 increase polarity of cholesterol to facilitate its elimination. However, they have recently

302 emerged as important lipid mediators that control a range of physiological processes  
303 including metabolism, immunity, and steroid hormone synthesis [25].

304

305 Our findings define a novel role for GPR183 in regulating the host immune response during  
306 Mtb infection. We initially identified GPR183 through a blood transcriptomic screen in TB  
307 and TB+T2D patients and found an inverse correlation between GPR183 expression and  
308 TB disease severity on chest x-ray. Although we demonstrate that the decrease in blood  
309 GPR183 in TB+T2D patients is likely due, in part, to a decreased frequency of non-classical  
310 monocytes expressing GPR183, we cannot rule out that reduced GPR183 expression in  
311 whole blood is partially attributable to neutrophils and eosinophils, which are excluded from  
312 the PBMC population. In our study the TB patients with T2D had more severe TB compared  
313 to those without T2D, therefore we cannot ascertain whether lower GPR183 expression is  
314 linked to TB+T2D comorbidity or TB disease severity.

315

316 We demonstrate that activation of GPR183 by  $7\alpha,25$ -OHC in primary human MNs during  
317 Mtb infection results in significantly better control of intracellular Mtb growth. This is in  
318 contrast to a recently published study showing increased Mtb growth with  $7\alpha,25$ -OHC when  
319 added post-infection in murine RAW264.7 cells [26]. The discrepancies between the studies  
320 could also be attributed to the different cell types and infection dose, which was 25 times  
321 higher in the aforementioned study. Consistent with the findings of Tang et al. [26] in murine  
322 cells we show that mycobacterial infection down-regulates GPR183 in human MNs, which  
323 may be an immune-evasion strategy specific to mycobacteria since LPS, a constituent of  
324 Gram-negative bacteria, upregulates GPR183 [13]. Whether the observed increase in  
325 phagocytosis in the presence of  $7\alpha,25$ -OHC is a non-specific effect driven by internalization

326 of agonist bound GPR183 and non-specific uptake of bacteria or an increase in pattern  
327 recognition receptors remains to be elucidated.

328

329 We further demonstrate that GPR183 activation by  $7\alpha,25$ -OHC reduces IFN- $\beta$  expression  
330 and secretion in Mtb-infected primary MNs and targeted GPR183 knockdown significantly  
331 upregulating *IRFs* and *IFNB1*. Similarly, gene expression of *IRF1*, *IRF5*, and *IRF7* is up-  
332 regulated in TB+T2D patients compared to TB patients, and corresponds with down-  
333 regulation of *GPR183*, thereby demonstrating that GPR183 expression is associated with  
334 IFN regulatory factors during human TB and GPR183 is a negative regulator of type I IFNs  
335 in Mtb-infected human MNs.

336

337 There is mounting evidence that the production of type-I IFNs is detrimental during Mtb  
338 infection [27, 28]. Up-regulation of type-I IFN blood transcript signatures occur in TB  
339 disease and correlates with disease severity [29]. In macrophages, Mtb induces up-  
340 regulation of *IFNB1* expression as early as 4h p.i. to limit IL-1 $\beta$  production, a critical  
341 mediator in the host defense against Mtb [30]. Although  $7\alpha,25$ -OHC significantly reduced  
342 *IFNB1* mRNA, we did not observe an increase in *IL1B* mRNA, suggesting that the GPR183-  
343 mediated regulation of type-I IFN does not influence *IL1B* expression. In addition to  
344 GPR183 mediated reduction in IFN- $\beta$ , we observed a decrease in IL-10 in Mtb-infected  
345 primary MNs treated with  $7\alpha,25$ -OHC. IL-10 production is induced by type-I IFN signaling  
346 [31, 32] and promotes Mtb growth [33] by reducing the bioavailability of TNF- $\alpha$  through the  
347 release of soluble TNF receptors and preventing the maturation of Mtb-containing  
348 phagosomes [33-36]. Collectively, we show that GPR183 is a negative regulator of type-I  
349 IFNs in primary MNs and agonist induced activation of GPR183 reduces Mtb-induced IFN-  
350  $\beta$  production, while leaving expression of cytokines important for Mtb control unchanged.

351

352 Further confirming the role of GPR183, GPR183 KO mice infected with Mtb had  
353 significantly higher bacterial burden in the lung compared to WT mice 2 weeks p.i. (prior to  
354 initiation of the adaptive immune response to Mtb) with this effect disappearing at 5 weeks  
355 p.i., when T cell responses against Mtb are fully established. Our results thus strengthen  
356 the contention that GPR183 plays an important role in the innate immune control of Mtb  
357 irrespective of hyperglycemia. We confirmed the importance GPR183 in regulating type-I  
358 interferons during Mtb infection in vivo. GPR183 KO mice infected with Mtb had significantly  
359 increased lung *Ifnb1* and *Irf3* mRNA. Unexpectedly, IFN- $\beta$  and IFN- $\gamma$  secretion were both  
360 significantly downregulated in the lung. These differences between mRNA and protein  
361 levels may be due to kinetic parameters of transcription versus translation or mRNA stability  
362 versus protein consumption.

363

364 Furthermore, we demonstrate that the GPR183 agonist  $7\alpha,25$ -OHC promotes autophagy in  
365 macrophages infected with mycobacteria. Autophagy is a cellular process facilitating the  
366 elimination of intracellular pathogens including Mtb [37]. Antimicrobial autophagy was  
367 shown to be inhibited by *Mycobacterium leprae* through upregulation of IFN- $\beta$  and autocrine  
368 IFNAR activation which in turn increased expression of the autophagy blocker OASL (2'-5'-  
369 oligoadenylate synthetase like) [38]. Whether there is a link between the  $7\alpha,25$ -OHC-  
370 induced reduction of IFN- $\beta$  production and the increase in autophagy remains to be  
371 investigated in future studies.

372

373 Several autophagy promoting re-purposed drugs including metformin are currently being  
374 assessed as HDTs for TB [39]. We propose that GPR183 is a potential target for TB HDT,  
375 warranting the development of specific, metabolically stable small-molecule agonists for this



376 receptor to ultimately improve TB treatment outcomes in TB patients with and without T2D  
377 co-morbidity.

378

### 379 **Author contributions**

380 ATG, SB and KR wrote the manuscript; ATG, SB, RS, SH, HS, MDN, CXF, LK, HT, TW,  
381 HBO, AMH, CEM, LVVC, NPW carried out the experiments; ATG, SB, MD, HS, RS and SH  
382 analyzed the data; TMP, MMR, LSS, GW, KR interpreted the data and developed the  
383 theoretical framework, KR conceived the original idea; all authors provided critical feedback  
384 and helped shape the research, analysis and manuscript.

385

### 386 **Acknowledgements**

387 We thank the clinical research team at Stellenbosch University for assistance with  
388 identification and recruitment of study participants as well as coordination of clinical and  
389 administrative activities. We thank Matthew Sweet for critical review of the manuscript.  
390 Illustrations were created with Biorender.com.

391

### 392 **Funding Sources**

393 This study was supported by the National Institutes of Health (NIH), National Institute of  
394 Allergy and Infectious Diseases (NIAID) and the South African Medical Research Council  
395 under the US-South African Program for Collaborative Biomedical Research (grant number:  
396 R01AI116039) to KR and by the TANDEM Grant of the EUFP7 (European Union's Seventh  
397 Framework Program) under Grant Agreement NO. 305279 to GW for study participant  
398 recruitment, by the Novo Nordisk Foundation to MMR and TMP. All other laboratory-based  
399 research activities were supported by grants from the Australian Infectious Diseases

400 Research Center, The Australian Respiratory Council and the Mater Foundation to KR. The  
401 Translational Research Institute is supported by a grant from the Australian Government.

402

403

404

405

406

407

## 408 **References**

409

410 1. Critchley JA, Restrepo BI, Ronacher K, et al. Defining a Research Agenda to Address  
411 the Converging Epidemics of Tuberculosis and Diabetes: Part 1: Epidemiology and Clinical  
412 Management. *Chest* **2017**; 152:165-73.

413 2. Ronacher K, van Crevel R, Critchley JA, et al. Defining a Research Agenda to Address  
414 the Converging Epidemics of Tuberculosis and Diabetes: Part 2: Underlying Biologic  
415 Mechanisms. *Chest* **2017**; 152:174-80.

416 3. Restrepo BI, Kleynhans L, Salinas AB, et al. Diabetes screen during tuberculosis contact  
417 investigations highlights opportunity for new diabetes diagnosis and reveals metabolic  
418 differences between ethnic groups. *Tuberculosis (Edinb)* **2018**; 113:10-8.

419 4. Hannedouche S, Zhang J, Yi T, et al. Oxysterols direct immune cell migration via EBI2.  
420 *Nature* **2011**; 475:524-7.

421 5. Gessier F, Preuss I, Yin H, et al. Identification and characterization of small molecule  
422 modulators of the Epstein-Barr virus-induced gene 2 (EBI2) receptor. *J Med Chem* **2014**;  
423 57:3358-68.

- 424 6. Rosenkilde MM, Benned-Jensen T, Andersen H, et al. Molecular pharmacological  
425 phenotyping of EBI2. An orphan seven-transmembrane receptor with constitutive activity. *J*  
426 *Biol Chem* **2006**; 281:13199-208.
- 427 7. Liu C, Yang XV, Wu J, et al. Oxysterols direct B-cell migration through EBI2. *Nature*  
428 **2011**; 475:519-23.
- 429 8. Benned-Jensen T, Norn C, Laurent S, et al. Molecular characterization of oxysterol  
430 binding to the Epstein-Barr virus-induced gene 2 (GPR183). *J Biol Chem* **2012**; 287:35470-  
431 83.
- 432 9. Daugvilaite V, Arfelt KN, Benned-Jensen T, Sailer AW, Rosenkilde MM. Oxysterol-EBI2  
433 signaling in immune regulation and viral infection. *Eur J Immunol* **2014**; 44:1904-12.
- 434 10. Pereira JP, Kelly LM, Xu Y, Cyster JG. EBI2 mediates B cell segregation between the  
435 outer and centre follicle. *Nature* **2009**; 460:1122-6.
- 436 11. Gatto D, Paus D, Basten A, Mackay CR, Brink R. Guidance of B cells by the orphan G  
437 protein-coupled receptor EBI2 shapes humoral immune responses. *Immunity* **2009**; 31:259-  
438 69.
- 439 12. Chalmin F, Rochemont V, Lippens C, et al. Oxysterols regulate encephalitogenic  
440 CD4(+) T cell trafficking during central nervous system autoimmunity. *J Autoimmun* **2015**;  
441 56:45-55.
- 442 13. Preuss I, Ludwig MG, Baumgarten B, et al. Transcriptional regulation and functional  
443 characterization of the oxysterol/EBI2 system in primary human macrophages. *Biochem*  
444 *Biophys Res Commun* **2014**; 446:663-8.
- 445 14. Gatto D, Wood K, Caminschi I, et al. The chemotactic receptor EBI2 regulates the  
446 homeostasis, localization and immunological function of splenic dendritic cells. *Nat Immunol*  
447 **2013**; 14:446-53.

- 448 15. Chiang EY, Johnston RJ, Grogan JL. EBI2 is a negative regulator of type I interferons in  
449 plasmacytoid and myeloid dendritic cells. *PLoS One* **2013**; 8:e83457.
- 450 16. Emgard J, Kammoun H, Garcia-Cassani B, et al. Oxysterol Sensing through the  
451 Receptor GPR183 Promotes the Lymphoid-Tissue-Inducing Function of Innate Lymphoid  
452 Cells and Colonic Inflammation. *Immunity* **2018**; 48:120-32.
- 453 17. Rutkowska A, Preuss I, Gessier F, Sailer AW, Dev KK. EBI2 regulates intracellular  
454 signaling and migration in human astrocyte. *Glia* **2015**; 63:341-51.
- 455 18. Rutkowska A, Shimshek DR, Sailer AW, Dev KK. EBI2 regulates pro-inflammatory  
456 signalling and cytokine release in astrocytes. *Neuropharmacology* **2018**; 133:121-8.
- 457 19. Li J, Lu E, Yi T, Cyster JG. EBI2 augments Tfh cell fate by promoting interaction with IL-  
458 2-queenching dendritic cells. *Nature* **2016**; 533:110-4.
- 459 20. Suan D, Nguyen A, Moran I, et al. T follicular helper cells have distinct modes of  
460 migration and molecular signatures in naive and memory immune responses. *Immunity*  
461 **2015**; 42:704-18.
- 462 21. Ralph AP, Ardian M, Wiguna A, et al. A simple, valid, numerical score for grading chest  
463 x-ray severity in adult smear-positive pulmonary tuberculosis. *Thorax* **2010**; 65:863-9.
- 464 22. Rueden CT, Schindelin J, Hiner MC, et al. ImageJ2: ImageJ for the next generation of  
465 scientific image data. *BMC Bioinformatics* **2017**; 18:529.
- 466 23. Benned-Jensen T, Smethurst C, Holst PJ, et al. Ligand modulation of the Epstein-Barr  
467 virus-induced seven-transmembrane receptor EBI2: identification of a potent and  
468 efficacious inverse agonist. *J Biol Chem* **2011**; 286:29292-302.
- 469 24. Benned-Jensen T, Rosenkilde MM. Structural motifs of importance for the constitutive  
470 activity of the orphan 7TM receptor EBI2: analysis of receptor activation in the absence of  
471 an agonist. *Mol Pharmacol* **2008**; 74:1008-21.

- 472 25. Mutemberezi V, Guillemot-Legris O, Muccioli GG. Oxysterols: From cholesterol  
473 metabolites to key mediators. *Prog Lipid Res* **2016**; 64:152-69.
- 474 26. Tang J, Shi Yn, Zhan L, Qin C. Downregulation of GPR183 on infection restricts the  
475 early infection and intracellular replication of mycobacterium tuberculosis in macrophage.  
476 *Microbial Pathogenesis* **2020**; 145:104234.
- 477 27. Donovan ML, Schultz TE, Duke TJ, Blumenthal A. Type I Interferons in the  
478 Pathogenesis of Tuberculosis: Molecular Drivers and Immunological Consequences. *Front*  
479 *Immunol* **2017**; 8:1633.
- 480 28. Moreira-Teixeira L, Mayer-Barber K, Sher A, O'Garra A. Type I interferons in  
481 tuberculosis: Foe and occasionally friend. *J Exp Med* **2018**; 215:1273-85.
- 482 29. Berry MP, Graham CM, McNab FW, et al. An interferon-inducible neutrophil-driven  
483 blood transcriptional signature in human tuberculosis. *Nature* **2010**; 466:973-7.
- 484 30. Novikov A, Cardone M, Thompson R, et al. Mycobacterium tuberculosis triggers host  
485 type I IFN signaling to regulate IL-1beta production in human macrophages. *J Immunol*  
486 **2011**; 187:2540-7.
- 487 31. McNab F, Mayer-Barber K, Sher A, Wack A, O'Garra A. Type I interferons in infectious  
488 disease. *Nat Rev Immunol* **2015**; 15:87-103.
- 489 32. Mayer-Barber KD, Andrade BB, Barber DL, et al. Innate and adaptive interferons  
490 suppress IL-1alpha and IL-1beta production by distinct pulmonary myeloid subsets during  
491 Mycobacterium tuberculosis infection. *Immunity* **2011**; 35:1023-34.
- 492 33. Beamer GL, Flaherty DK, Assogba BD, et al. Interleukin-10 promotes Mycobacterium  
493 tuberculosis disease progression in CBA/J mice. *J Immunol* **2008**; 181:5545-50.
- 494 34. Hart PH, Hunt EK, Bonder CS, Watson CJ, Finlay-Jones JJ. Regulation of surface and  
495 soluble TNF receptor expression on human monocytes and synovial fluid macrophages by  
496 IL-4 and IL-10. *J Immunol* **1996**; 157:3672-80.

- 497 35. O'Leary S, O'Sullivan MP, Keane J. IL-10 blocks phagosome maturation in  
498 mycobacterium tuberculosis-infected human macrophages. *Am J Respir Cell Mol Biol* **2011**;  
499 45:172-80.
- 500 36. Armstrong L, Jordan N, Millar A. Interleukin 10 (IL-10) regulation of tumour necrosis  
501 factor alpha (TNF-alpha) from human alveolar macrophages and peripheral blood  
502 monocytes. *Thorax* **1996**; 51:143-9.
- 503 37. Chandra P, Kumar D. Selective autophagy gets more selective: Uncoupling of  
504 autophagy flux and xenophagy flux in Mycobacterium tuberculosis-infected macrophages.  
505 *Autophagy* **2016**; 12:608-9.
- 506 38. Toledo Pinto TG, Batista-Silva LR, Medeiros RCA, Lara FA, Moraes MO. Type I  
507 Interferons, Autophagy and Host Metabolism in Leprosy. *Front Immunol* **2018**; 9:806.
- 508 39. Cerni S, Shafer D, To K, Venketaraman V. Investigating the Role of Everolimus in  
509 mTOR Inhibition and Autophagy Promotion as a Potential Host-Directed Therapeutic Target  
510 in Mycobacterium tuberculosis Infection. *J Clin Med* **2019**; 8.

511

512

513 **Fig 1. GPR183 mRNA expression in patients with active and latent TB infection with**  
514 **or without T2D.** Total RNA was isolated from whole blood incubated overnight in  
515 QuantiFERON-TB Gold. *GPR183* mRNA expression was determined and normalized to  
516 reference genes using the NanoString technology. *GPR183* expression in whole blood of  
517 **(A)** TB (n=9) and TB+T2D (n=7) patients, **(B)** LTBI (n=11) and LTBI+T2D (n=14) patients,  
518 Wilcoxon test. **(C)** TB (n=9) and TB+T2D (n=7) patients at baseline and 6 month's  
519 treatment, *t*-test. **(D)** Linear correlation between *GPR183* expression and chest X ray score,  
520 TB+T2D patients (n=7) filled squares, TB patients (n=8) open circles. Data are presented  
521 as means  $\pm$  SEM; ns,  $P > 0.05$ ; \*,  $P \leq 0.05$ .

522

523 **Fig 2. Oxysterol-induced activation of GPR183 in primary MNs significantly inhibits**  
524 **intracellular mycobacterial growth, while GPR183 knockdown increases intracellular**  
525 **mycobacterial growth.** Primary MNs from eight donors **(A)** and seven donors **(B)** were  
526 infected with BCG or Mtb H<sub>37</sub>R<sub>v</sub> (MOI 1),  $\pm$  7 $\alpha$ ,25-OHC (100 nM),  $\pm$  GSK682753 (10  $\mu$ M).  
527 Uptake of **(A)** BCG and Mtb H<sub>37</sub>R<sub>v</sub> was determined at 2h p.i. Growth of **(B)** BCG and Mtb  
528 H<sub>37</sub>R<sub>v</sub> was determined at 48h post-infection. Percent of mycobacterial growth was  
529 calculated as the fold change of CFU at 48h compared to CFU at 2h, normalized to non-  
530 treated cells. PMA-differentiated THP-1 cells were transfected with 20 nM of either negative  
531 control siRNA or GPR183 siRNA for 48h before infection with BCG (MOI 1). **(C)**  
532 Mycobacterial uptake was determined at 2h and **(D)** intracellular mycobacterial growth was  
533 determined at 48h p.i. (normalized to uptake). Data are presented as means  $\pm$  SEM; \*,  $P \leq$   
534 0.05; \*\*,  $P \leq 0.01$ ; \*\*\*,  $P \leq 0.001$ ; paired *t*-test.

535

536 **Fig 3. GPR183 knockdown increases expression of transcription factors regulating**  
537 **type I interferon responses. (A)** Total RNA was isolated from primary MNs following 48h  
538 incubation with 20 nM GPR183 siRNA (or negative control siRNA). Gene expression of  
539 *IFNB1*, *IRF1*, *IRF3*, *IRF5*, *IRF7* was measured by qRT-PCR using RPS13 as reference  
540 gene. Data are, normalized to cells transfected with negative control siRNA. **(B)** NanoString  
541 analyses of RNA isolated from TB and TB+T2D cohort showed similar increase in type I  
542 IFNs associated genes *IRF1*, *IRF5*, *IRF7*. Data are presented as fold changes  $\pm$  SEM; \*,  $P$   
543  $\leq 0.05$ ; \*\*,  $P \leq 0.01$ ; paired  $t$ -test.

544

545 **Fig 4. Activation of GPR183 leads to cytokine production favoring Mtb control.**  
546 Primary MN from healthy donors (n=8) were infected for 2h with Mtb H<sub>37</sub>R<sub>v</sub> (MOI 10:1),  
547 7 $\alpha$ ,25-OHC (100 nM), and/or GSK682753 (10  $\mu$ M). Cells were washed and left with drugs  
548 for a further 22h. Changes in the expression of **(A)** *IFNB1*, *TNF* and *IL10* were measured by  
549 qPCR and normalized to untreated infected cells. Concentrations of **(B)** IFN- $\beta$ , TNF- $\alpha$  and  
550 IL-10 in the culture supernatant were measured by ELISA. Data are presented as mean fold  
551 change  $\pm$  SEM or min to max for box plots; \*,  $P \leq 0.05$ ; \*\*,  $P \leq 0.01$ ; \*\*\*\*,  $P \leq 0.0001$ ; paired  
552  $t$ -test.

553

554 **Fig 5. Treatment with 7 $\alpha$ ,25-OHC induces autophagy.** PMA-differentiated THP-1 cells  
555 were infected/uninfected and co-incubated with  $\pm$  7 $\alpha$ ,25-OHC,  $\pm$  GSK682753, for 2h.  
556 Extracellular BCG was removed and cells were incubated for a further 4h or 22h in RPMI  
557 medium containing drugs. **(A)** Cells were lysed at 6h or 24h (Flux) p.i. **(B)** The band  
558 intensity was then normalized to the reference protein, GAPDH and further normalized to  
559 the BCG. Autophagic flux was obtained by subtracting chloroquine positive values with  
560 chloroquine negative values. **(C)** Cells were visualized using the Olympus FV 3000 confocal



561 microscope. At least 30 cells were counted for every condition. Data are presented as  $\pm$   
562 SEM; ns,  $P > 0.05$ ; \*,  $P \leq 0.05$ ; \*\*,  $P \leq 0.01$ ; unpaired  $t$ -test.

563

564 **Fig 6. GPR183KO mice have higher lung CFU, corresponding with increased**  
565 **expression of transcription factors regulating type I interferon responses.** Mice were  
566 infected with 300 CFU of aerosol Mtb H<sub>37</sub>R<sub>v</sub>. **(A)** Bacterial lung burden 2 weeks p.i. **(B)**  
567 Total histology lung score. RNA was isolated from Mtb-infected lung and blood samples 2  
568 weeks p.i. **(C)** Gene expression of *Ifnb1*, *Irf3* and *Irf7* in the lungs, **(D)** *Ifnb1*, *Irf3* and *Irf7* in  
569 the blood, was measured by qRT-PCR using *Hprt1* as reference gene. Data are presented  
570 as  $\pm$  SEM; ns,  $P > 0.05$ ; \*,  $P \leq 0.05$ ; \*\*,  $P \leq 0.01$

571

572 **Fig 7. Pro-inflammatory cytokine expression at 2 weeks p.i. of Mtb H<sub>37</sub>R<sub>v</sub>-infected**  
573 **mice.** Mice were infected with 300 CFU of aerosol Mtb H<sub>37</sub>R<sub>v</sub>. **(A)** Gene expression of *Ifng*,  
574 *Il1b* and *Tnf* in the lungs **(B)** Concentrations of IFN- $\beta$ , IFN- $\gamma$ , IL-1 $\beta$  and TNF- $\alpha$  in the culture  
575 supernatant were measured by ELISA. Data are presented as  $\pm$  SEM; ns,  $P > 0.05$ ; \*,  $P \leq$   
576 0.01

577

578

579

580

581

582

583

584

585

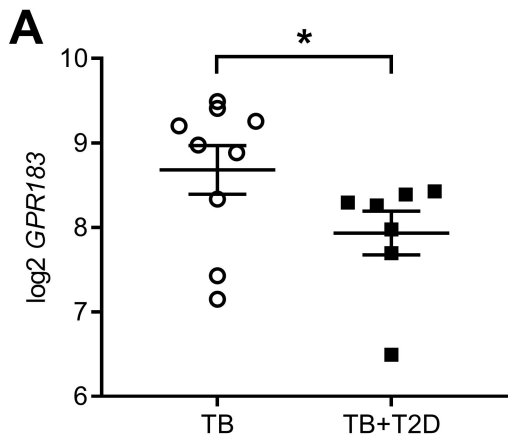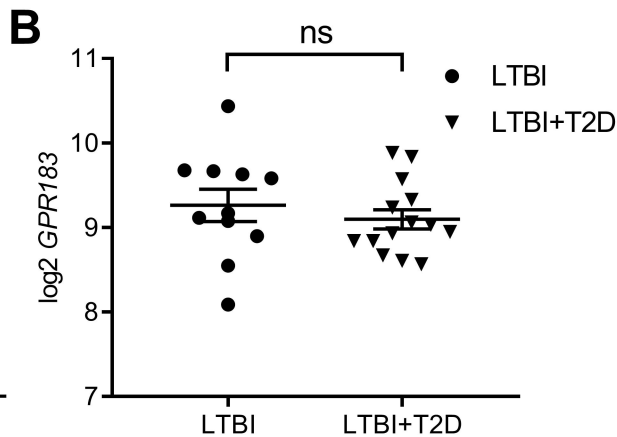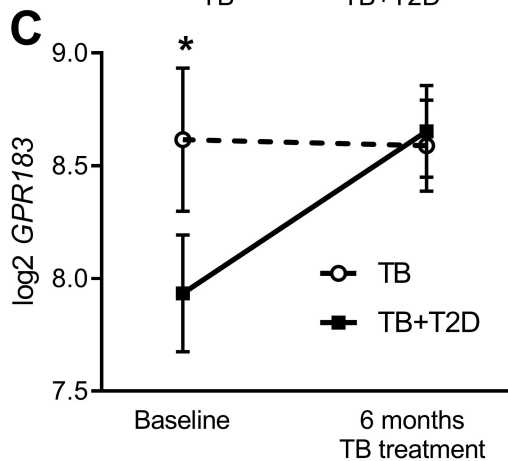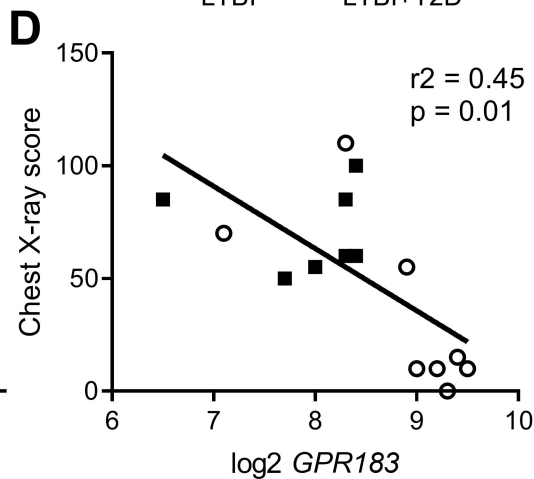

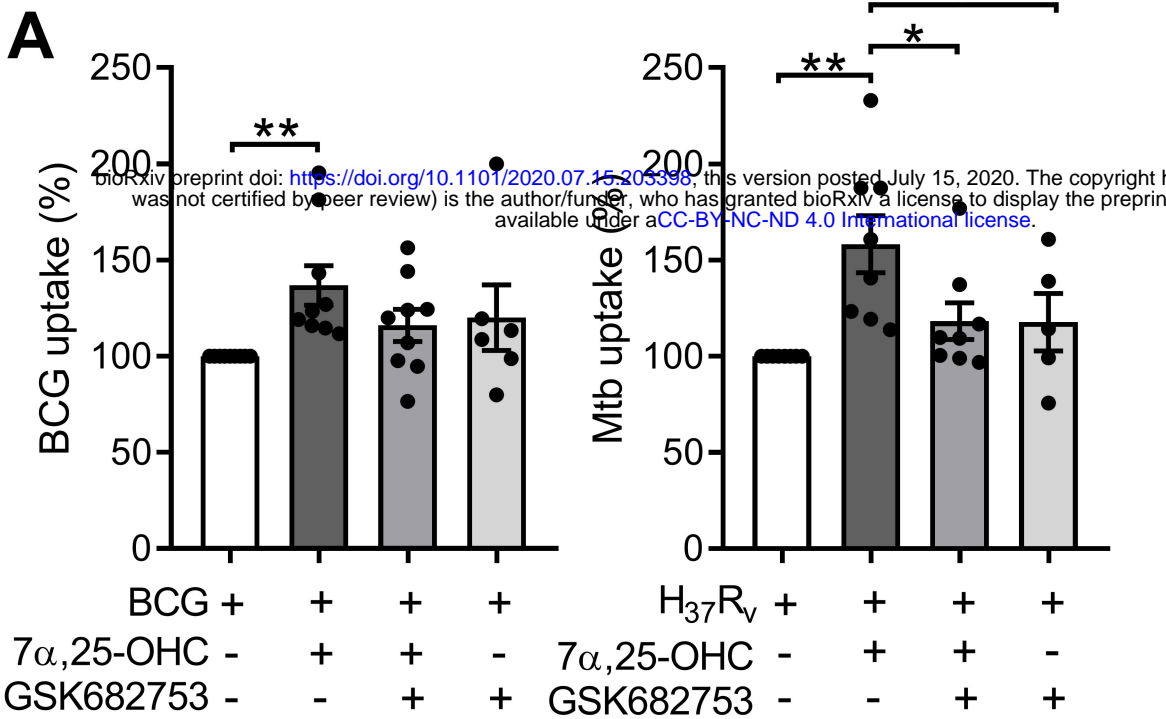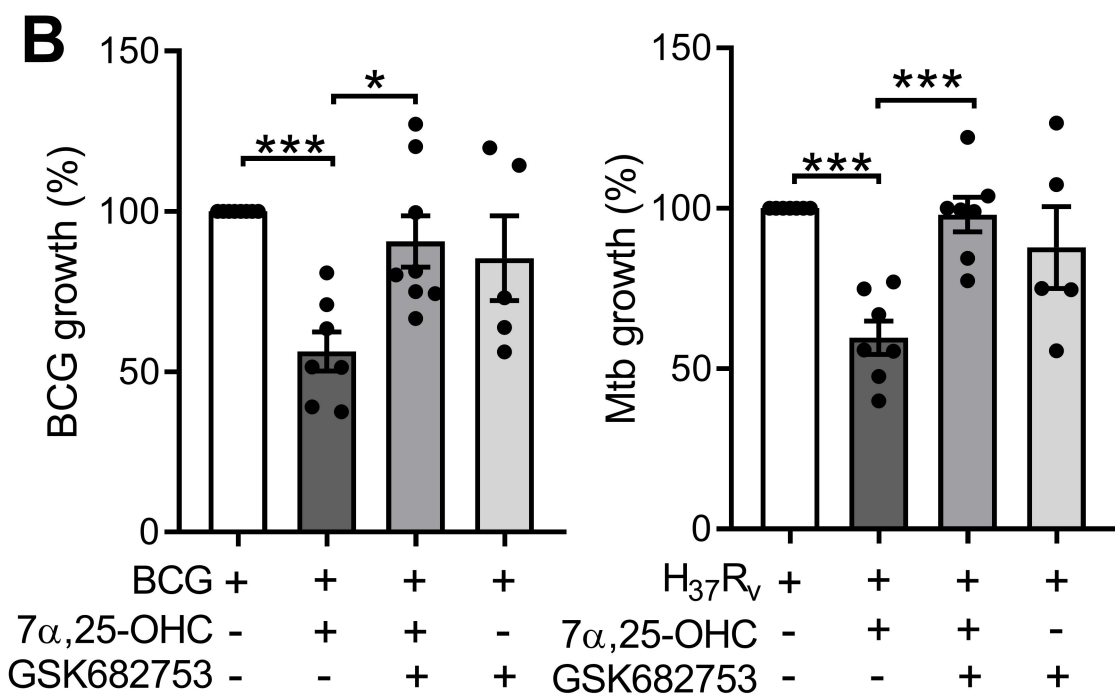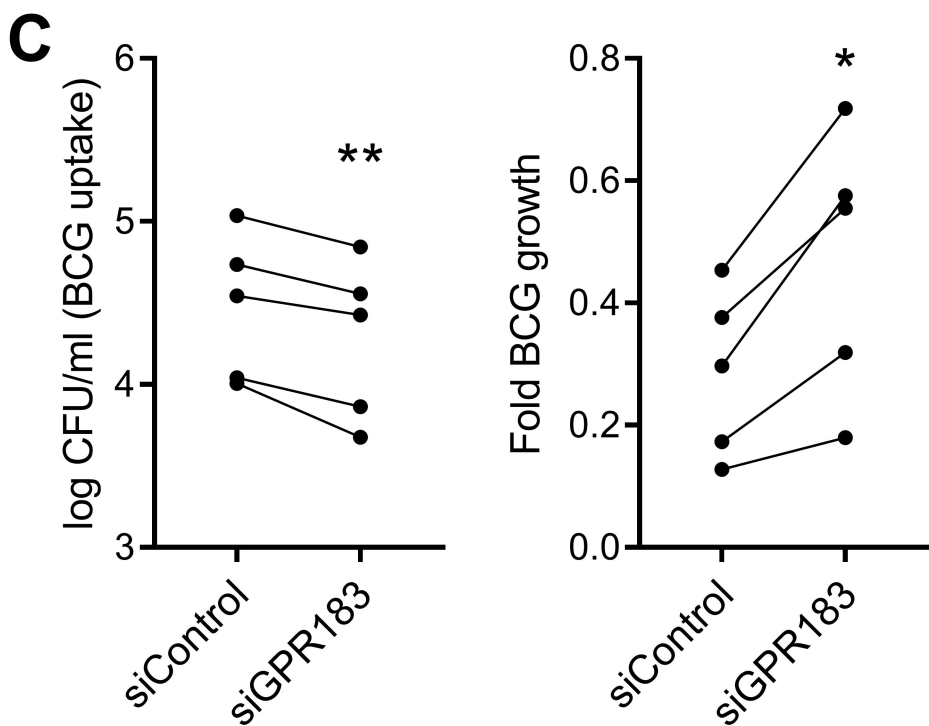

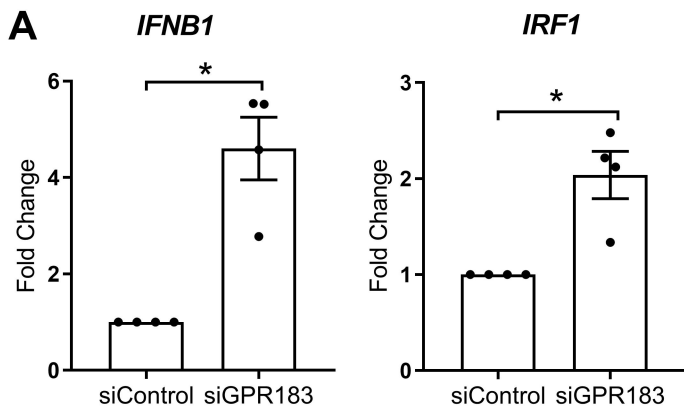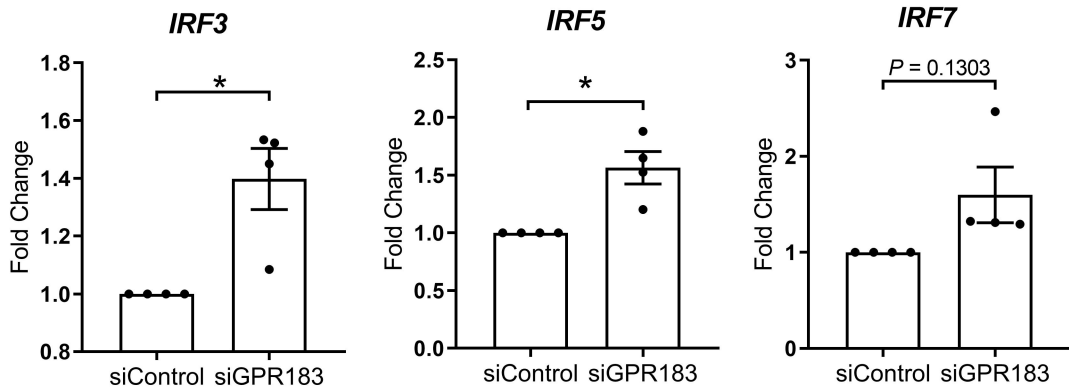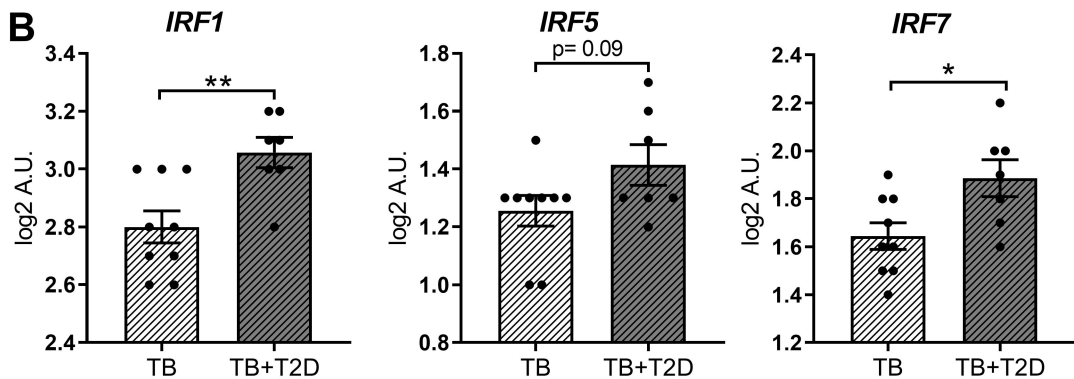

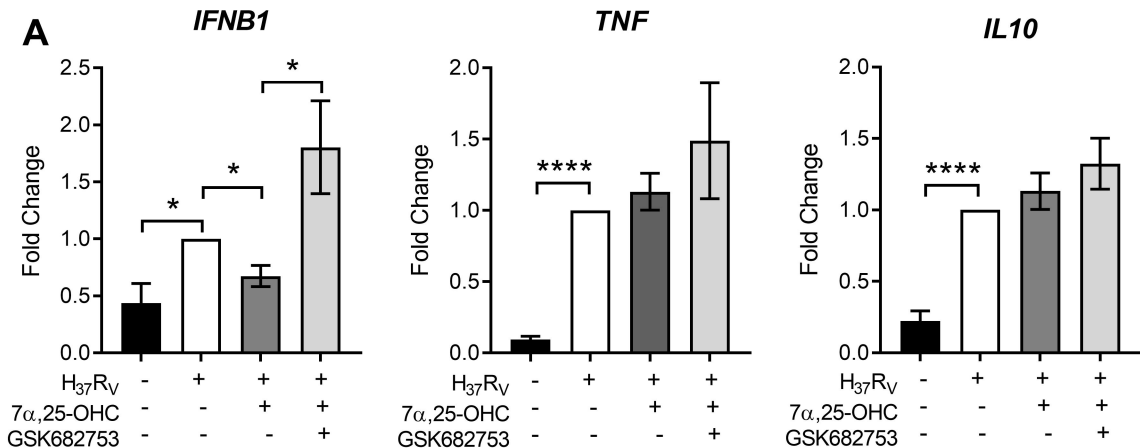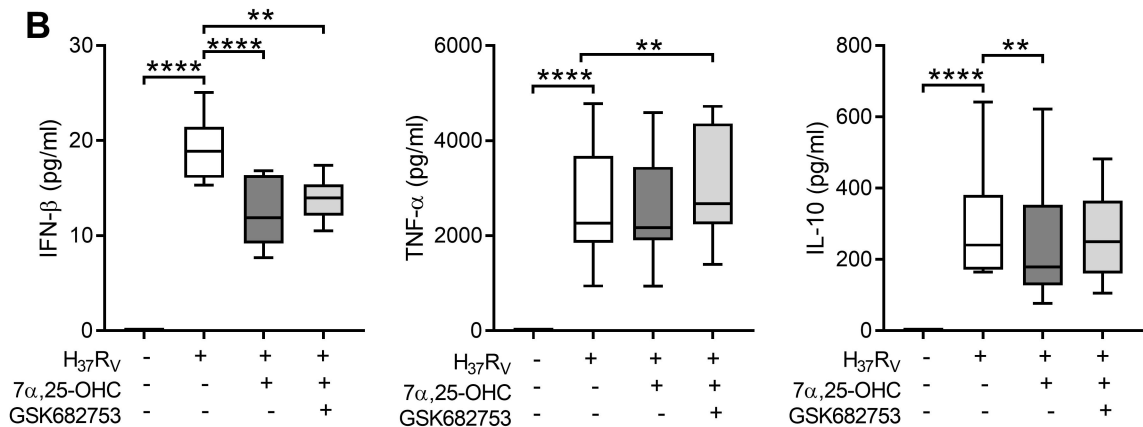

**A**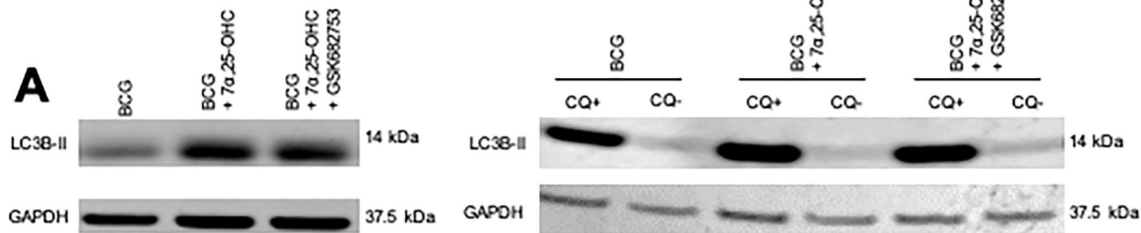**B**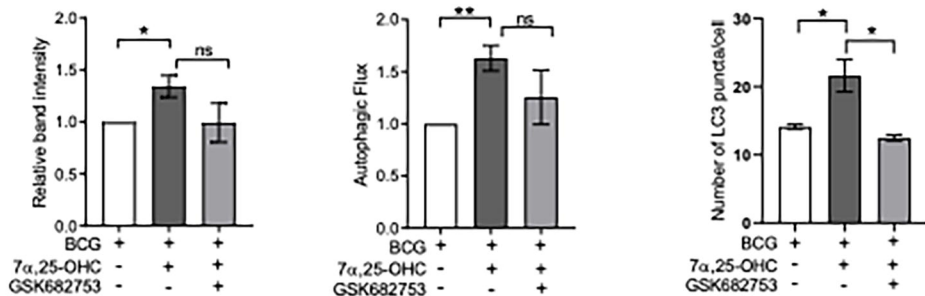**C**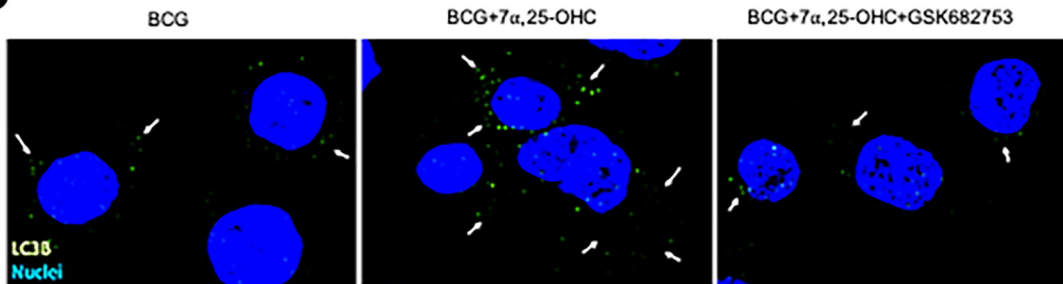

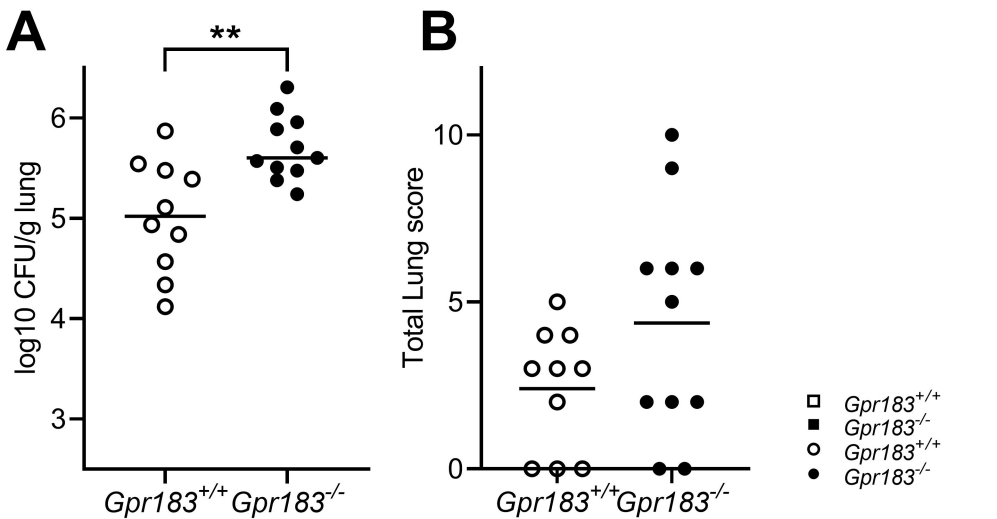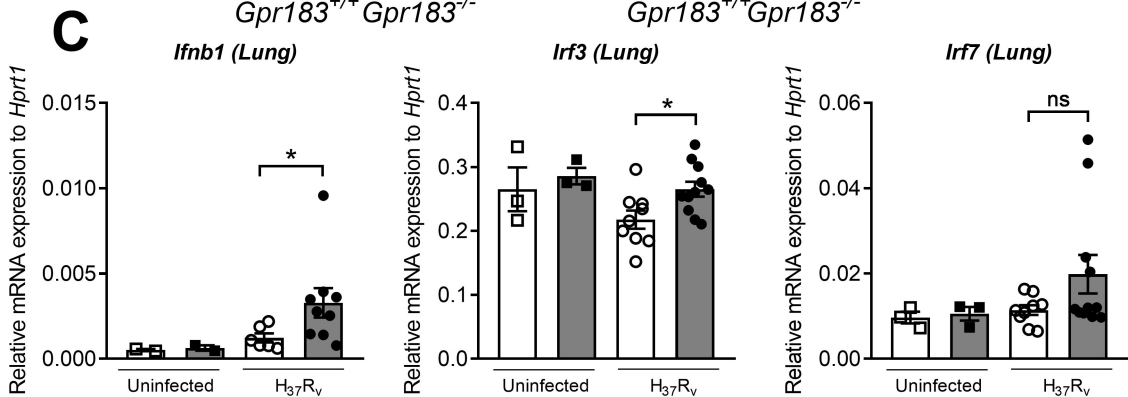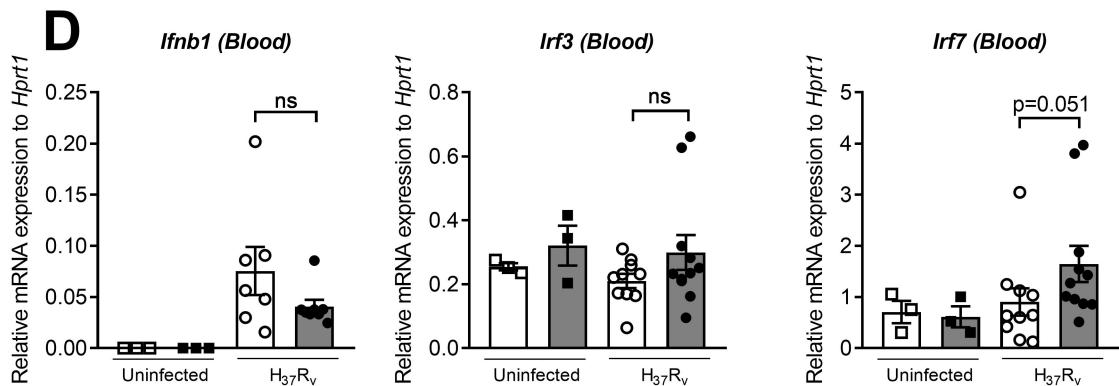

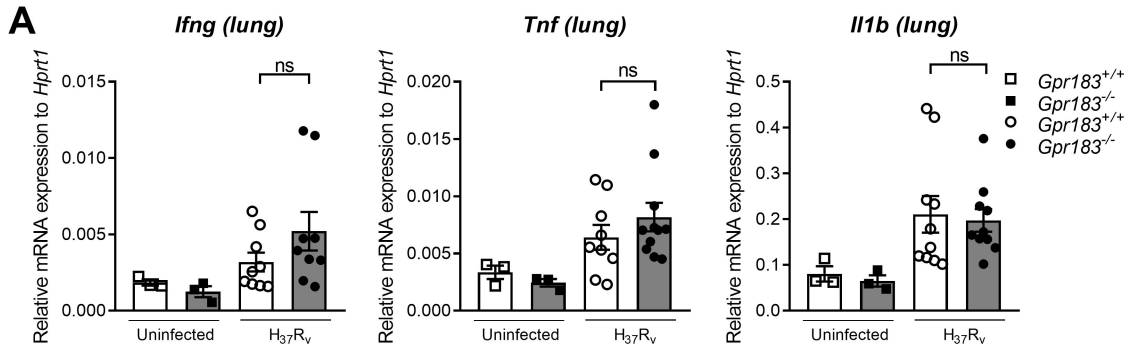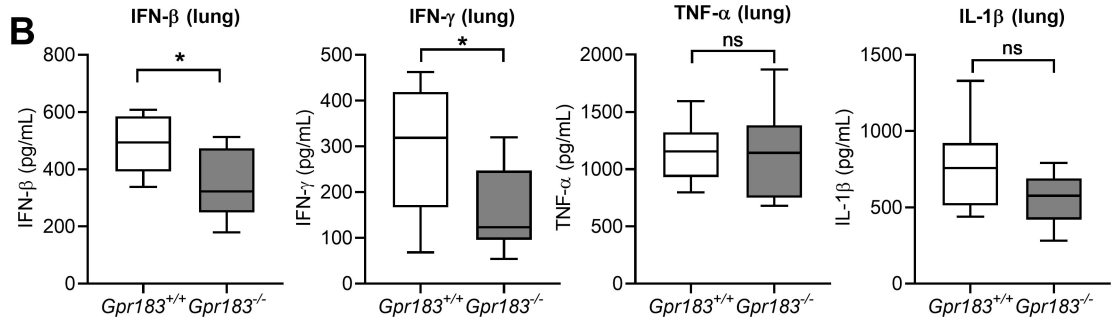

Source: https://www.biorxiv.org/content/10.1101/2020.07.15.203398.full.pdf
